# Supplementary material for: β-Catenin inhibition shapes tumor immunity and synergizes with immunotherapy in colorectal cancer
Source: PubMed Central journal article supplement — Oncoimmunology. 2020 Aug 31;9(1):1809947. doi: 10.1080/2162402X.2020.1809947 (PMC7470182; doi:10.1080/2162402x.2020.1809947), 2020-08-31
Supplement: KONI_A_1809947_SM5216.pdf [file KONI_A_1809947_SM5216.pdf]

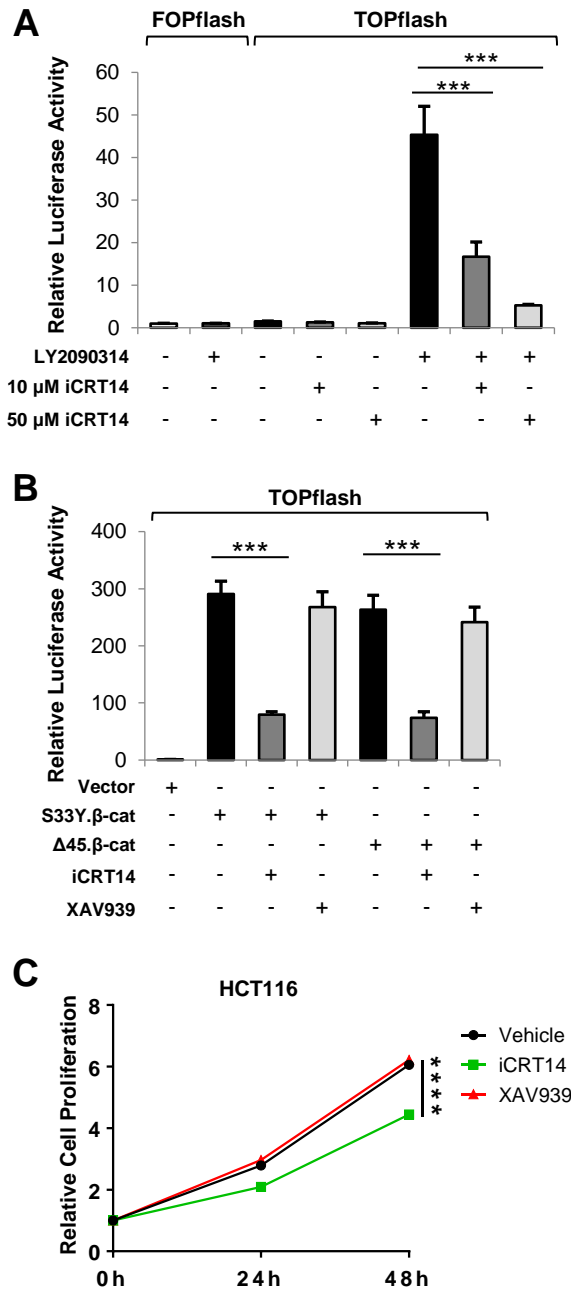

**Supplemental Figure S1.** iCRT14 inhibits the activity of mutant  $\beta$ -catenin. **(A)** 293T cells were transfected with  $\beta$ -catenin/TCF reporter construct (TOPflash) and its mutant control (FOPflash). Cells were treated with 10 nM LY2090314 and iCRT14 at indicated concentrations.  $n = 4$ . **(B)** 293T cells were transfected with TOPflash together with empty vector, S33Y. $\beta$ -catenin or  $\Delta$ 45. $\beta$ -catenin constructs, then treated with 25  $\mu$ M iCRT14 or 25  $\mu$ M XAV939 for 24h.  $n = 4$ . **(C)** HCT116 cells were treated with 25  $\mu$ M iCRT14 or 25  $\mu$ M XAV939 for indicated time. Viable cells were quantified by CCK-8 assay.  $n = 4$ . \*\*\*  $P < 0.001$ , \*\*\*\*  $P < 0.0001$ .

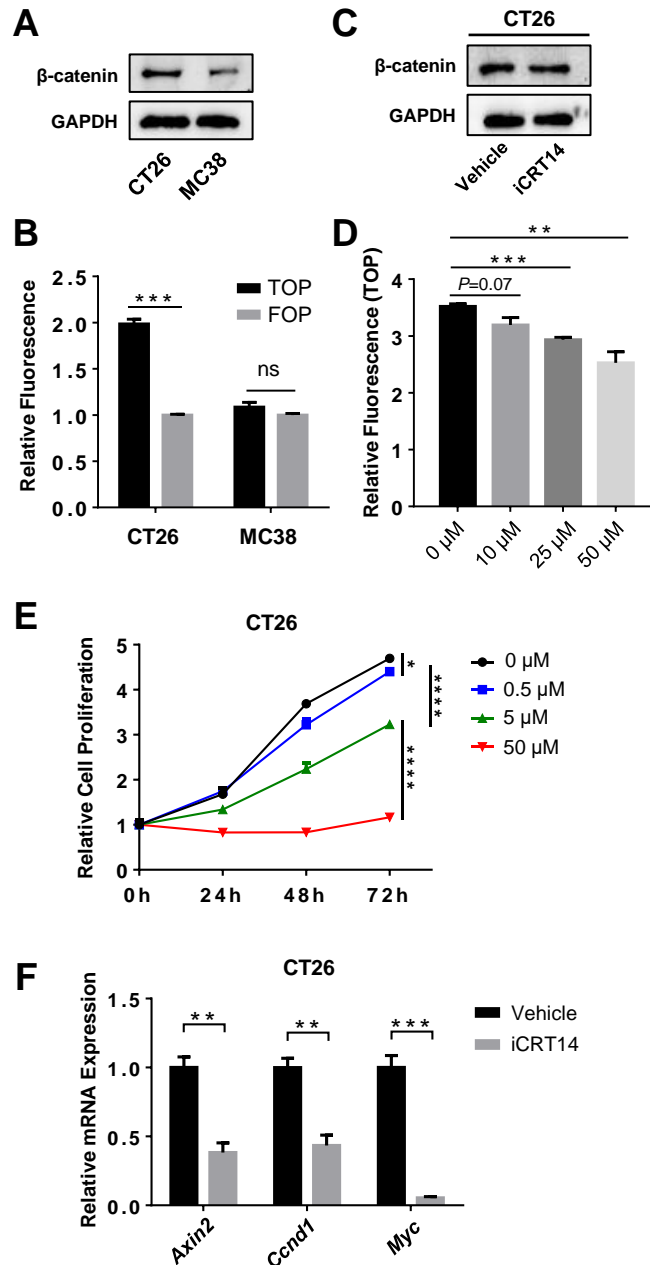

**Supplemental Figure S2.** iCRT14 inhibits colorectal tumor cell growth and target gene expression. (A) Western blot for  $\beta$ -catenin and GAPDH in CT26 and MC38 cells. (B) Activities of  $\beta$ -catenin/TCF reporter (TOP) or its mutant control (FOP) in CT26 and MC38 cells.  $n = 3$ . (C) Western blot for  $\beta$ -catenin in CT26 cells treated with 25  $\mu$ M iCRT14 for 24 hours. (D) Activity of  $\beta$ -catenin/TCF reporter (TOP) in CT26 cells treated with iCRT14 at indicated concentrations.  $n = 3$ . (E) CT26 cells were treated with 0  $\mu$ M, 0.5  $\mu$ M, 5  $\mu$ M or 50  $\mu$ M iCRT14 for indicated time. Viable cells were quantified by CCK-8 assay.  $n = 4$ . (F) Quantification of mRNA expression by qPCR.  $n = 3$ . \*  $P < 0.05$ , \*\*  $P < 0.01$ , \*\*\*  $P < 0.001$ , \*\*\*\*  $P < 0.0001$ .

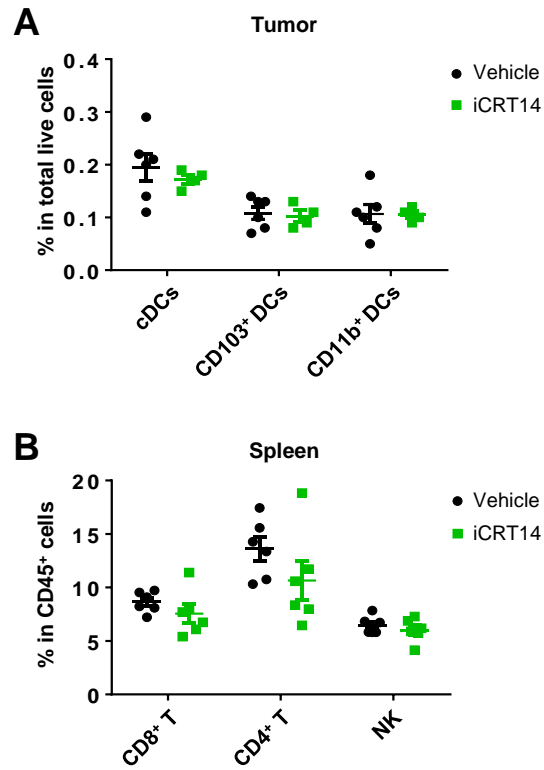

**Supplemental Figure S3.** iCRT14 treatment does not affect tumor-infiltrating dendritic cells or splenic immune cells. Mice bearing CT26 tumors were treated with iCRT14 or vehicle for 12 days. FACS was performed to analyze tumor-infiltrating cDCs (CD45<sup>+</sup>CD11c<sup>+</sup>MHC-II<sup>+</sup>CD64<sup>-</sup>Gr-1<sup>-</sup>) (**A**), and splenic T and NK cells (**B**).

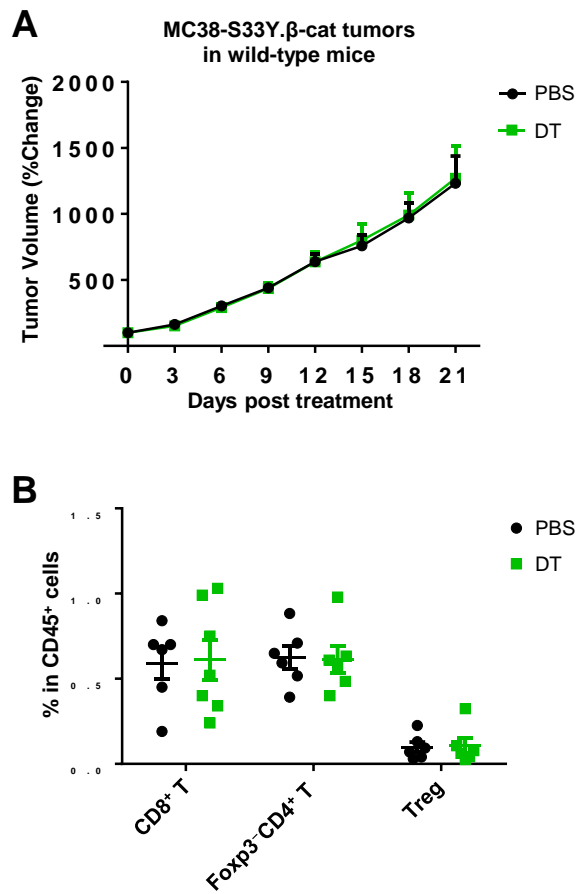

**Supplemental Figure S4.** DT treatment does not affect tumor growth or T cell infiltration in wild-type mice. Wild-type C57BL/6 mice bearing MC38-S33Y.β-cat tumors were treated with DT or PBS every four days. Tumor growth was monitored for 21 days post the first injection (n = 8/group) (**A**). FACS was performed one day after the third injection of DT to analyze tumor-infiltrating CD8<sup>+</sup> T, conventional Foxp3<sup>-</sup>CD4<sup>+</sup> T and Treg cells (**B**).
